# Supplementary material for: 'Exacerbation-free time' to assess the impact of exacerbations in patients with chronic obstructive pulmonary disease (COPD): a prospective observational study
Source: PubMed Central journal article supplement (PMC5882661; doi:10.1038/s41533-018-0079-5), 2018-04-03
Supplement: 41533_2018_79_MOESM1_ESM.pdf [file 41533_2018_79_MOESM1_ESM.pdf]

## Appendix 1

**Content of TEXAS call** (translated to English, original questions were in Dutch)\*

Introduction:

**The following questions concern your respiratory symptoms:**

During the last two weeks, did you experience any events of **two or more days** on which ...

- |                                                                                                                                                    |                                            |
|----------------------------------------------------------------------------------------------------------------------------------------------------|--------------------------------------------|
| 1. ... you were <b>shorter of breath</b> than usual?                                                                                               | 1=YES / 2=NO                               |
| 2. ... you had <b>more sputum</b> than usual?                                                                                                      | 1=YES / 2=NO                               |
| 3. ... your <b>sputum</b> was <b>different in colour or composition</b> than usual?                                                                | 1=YES / 2=NO                               |
| 4. ... you experienced <b>more wheezing</b> or your <b>chest felt tighter</b> ?                                                                    | 1=YES / 2=NO                               |
| 5. ... you had a <b>sore throat</b> ?                                                                                                              | 1=YES / 2=NO                               |
| 6. ... you had to <b>cough more</b> than usual?                                                                                                    | 1=YES / 2=NO                               |
| 7. ... you had a <b>cold or a runny nose</b> ?                                                                                                     | 1=YES / 2=NO                               |
| 8. ... you used <b>more puffs</b> of your bronchodilator than usual?                                                                               | 1=YES / 2=NO                               |
| 9. During the last two weeks, did you initiate a course of <b>prednisolone or antibiotics</b> because of a worsening of your respiratory symptoms? | 1=YES / 2=NO                               |
| 10. Did you experience days on which you were not able to perform your usual                                                                       | 1=YES / 2=NO                               |
| 10.b On how many days did you experience this?                                                                                                     | PRESS THE NUMBER OF<br>DAYS AND END WITH # |
| 11. During the last two weeks did you need any unscheduled medical attention because of a worsening of your respiratory symptoms?                  | 1=YES / 2=NO                               |
| 11.b If so, did you visit your general practitioner (GP)?                                                                                          | press <b>1</b>                             |
| Or did you visit an Emergency Department?                                                                                                          | press <b>2</b>                             |
| Or did you visit the GP after-hour service?                                                                                                        | press <b>3</b>                             |
| Or did you visit more than one of the above mentioned care providers?                                                                              | press <b>4</b>                             |
| 12. Do you have any additional information or do you want to leave a                                                                               | 1= YES**/ 2=NO                             |

**Thank you for answering this call. We will call you back in 14 days.**

**\* Patients received a laminated summary card with the precise questions and response**

**categories for the TEXAS calls**

**\*\* After pressing '1', patients were able to leave a short spoken message**
